# Supplementary material for: Cobalt–graphene nanomaterial as an efficient catalyst for selective hydrogenation of 5-hydroxymethylfurfural into 2,5-dimethylfuran
Source: Royal Society of Chemistry journal article supplement (doi:10.1039/c9cy00330d), 2019-01-01
Supplement: c9cy00330d1.pdf [file c9cy00330d1.pdf]

# Supporting Information

## Cobalt–graphene nanomaterial as an efficient catalyst for selective hydrogenation of 5-hydroxymethylfurfural into 2,5-dimethylfuran

Fan Yang,<sup>a</sup> Jingbo Mao,<sup>a</sup> Shenmin Li,<sup>a</sup> Jingmei Yin,<sup>a</sup> Jinxia Zhou\*<sup>a</sup> and Wei Liu<sup>b</sup>

<sup>a</sup>College of Environmental and Chemical Engineering, Dalian University, Dalian, China.

<sup>b</sup>Dalian National Laboratory for Clean Energy, Dalian Institute of Chemical Physics, Chinese Academy of Sciences, Dalian, China.

\*Corresponding author: Email: zhoujxmail@163.com; Tel: (+86)411-87403214.

## Experimental

### Materials

5-Hydroxymethyl-2-furaldehyde (HMF) (98%) was obtained from Fluorochem Ltd., UK. Ethanol absolute ( $\geq 99.7\%$ ) was purchased from Tianjin Damao Chemical Reagent Factory (China). 2,5-Dimethylfuran (DMF) (99%) were purchased from J&K Chemical Reagent Co., Ltd. (China). 5-Methylfuran-2-yl)methanol (MFA) (98%) was purchased from Yuanye Bio-Technique Co. Ltd (Shanghai, China). 2,5-Bihydroxymethylfuran (BHMF) (98%) was purchased from Dibo Chemical Reagent Co., Ltd (Shanghai, China).  $\text{Fe}(\text{NO}_3)_3 \cdot 9\text{H}_2\text{O}$  ( $\geq 98.0\%$ ),  $\text{Co}(\text{NO}_3)_2 \cdot 6\text{H}_2\text{O}$  ( $\geq 98.5\%$ ),  $\text{Ni}(\text{NO}_3)_2 \cdot 6\text{H}_2\text{O}$  ( $\geq 98.0\%$ ),  $\text{KNO}_3$  ( $\geq 99.0\%$ ),  $\text{KMnO}_4$  ( $\geq 99.0\%$ ) and  $\text{H}_2\text{SO}_4$  (95~98%) were supplied by Tianjin Kermel Chemical Reagent Co., Ltd. (China). Graphite (99.95% metals basis,  $\geq 325$  mesh) and tetradecane (99%) were purchased from Aladdin Chemical Reagent Co., Ltd. (China). Hydrazine hydrate (80% in water) was purchased from Sinopharm Chemical Reagent Co., Ltd.(China). All aforementioned chemicals were used without further purification.

Activated carbon (AC, vacuum drying at 105 °C for 10h before use) was obtained from Beijing Jindawei Activated Carbon Co., Ltd. (China).

### Catalyst preparation

Reduced graphene oxide (rGO) was prepared following the method we used before.<sup>S1</sup> Briefly, the graphene oxide (GO) was prepared following a modified Hummers' method.<sup>S2</sup> The obtained GO suspension was reduced with hydrazine hydrate (80% in water) followed by filtering and washing with deionized water. The yielded filter cake was dried with freeze-drying method to get a reduced graphene oxide (rGO). The hydrogen-treated rGO (HrGO) was obtained by calcination of rGO in  $\text{H}_2$  at 700 °C for 1h.

The catalysts were prepared by impregnation-calcination method. Taking Co-carried rGO as an example, the first step was to support the cobaltnitrate on the rGO surface by incipient wetness impregnation method.<sup>26</sup> The solution used to dissolve cobaltnitrate was 20 wt% of ethanol water solution. The impregnation mixture was vacuum dried at 50 °C for 12 h. The second step was to calcinate the impregnation mixture at 500 °C under  $\text{N}_2$  flow in a tube furnace for 2 h (heating rate: 10 °C/min). The preparation methods of the Co-carried HrGO and AC were the same as above. The catalysts prepared were designated as  $\text{Co}_x/\text{support}$ , in which x represent the amount of Co metal loaded on per gram support (mmol/g). For example,  $\text{Co}_{1.0}/\text{rGO}$  is a catalyst with 1.0 mmol Co loaded on 1.0 g of rGO. The catalysts after the calcinations were used in reactions directly. The BET specific surface areas of  $\text{Co}_{1.0}/\text{rGO}$ ,  $\text{Co}_{1.0}/\text{HrGO}$  and  $\text{Co}_{1.0}/\text{AC}$  are 476  $\text{m}^2 \text{g}^{-1}$ , 357  $\text{m}^2 \text{g}^{-1}$  and 716  $\text{m}^2 \text{g}^{-1}$ , respectively. For comparative analysis, cobalt oxide was obtained by calcining cobalt nitrate at 500 °C in a muffle furnace.

## Catalyst characterization

High resolution transmission electron microscopy (HRTEM) images were carried out on a Tecnai G2 F30 microscope. High-angle annular dark-field scanning transmission electron microscopy (HAADF-STEM) images were obtained on a JEOL JEM-ARM200F STEM/TEM equipped with a CEOS probe corrector, with a guaranteed resolution of 0.08 nm. To prepare samples for the image study, graphene derived samples were dispersed in ethanol, and deposited onto copper grids coated with a thin holey carbon film. Temperature programmed reduction (TPR) of the catalysts were analyzed by self-assembly instrument. For each test, 20 mg of the sample was dried in nitrogen at 200 °C for 1 h and then reduced in 5 vol.% H<sub>2</sub>/Ar gas mixture (30 mL/min) at a linear heating rate of 10 °C/min in the temperature range from 50 °C to 850 °C. The exhaust gas after removal of moisture was first monitored by a TCD detector for testing the H<sub>2</sub> consumption amount, followed by component analysis with a gas chromatography (Agilent 7820 with a TCD detector and a FID detector). Surface area measurement with nitrogen adsorption was performed with a Micromeritics ASAP 2020. The specific surface area ( $S_{\text{BET}}$ ) was determined by the BET equation ( $P/P^0 = 0.05-0.3$ ). Mass spectroscopy was performed on a GC-MS system (HP Agilent 6890N-5973N) for compound structure analysis. X-ray powder diffraction (XRD) patterns were recorded at room temperature on a Rigaku SmartLab 9kW (M/s. Rigaku Corporation, Japan) X-ray diffractometer using Cu K $\alpha$  radiation ( $\lambda = 1.5406 \text{ \AA}$ ) with a scan range of 2-80° at 40 kV and 30 mA. The contents of C, H, O and N in graphene materials were obtained with Elemental Analyzer vario EL cube.

## Catalytic performance measurement

HMF hydrogenation was carried out in an autocontrol batch-reactor system consisting of stainless steel autoclaves (50 mL) under mechanical stirring (Beijing Century Senlang Experimental Apparatus Co., Ltd.). In a typical run, 500 mg of HMF, 50 mg of catalyst (without pre-reduction treatment), 20 mL of ethanol and a given amount of tetradecane as an inert internal standard were loaded into the autoclave and sealed. After purged five times with H<sub>2</sub>, the reactor was pressurized with H<sub>2</sub> to 2 MPa at room temperature. Then, the reactor was heated to 200 °C and maintained for 1 hour at 500 rpm. When the time is due, the reaction was quenched immediately with cold water. The liquid mixture obtained was filtered using a 0.2 mm syringe filter to remove the catalyst for compositional analysis by GC. The recycle studies were carried out as follows. After each catalytic run, the spent catalyst was recovered from the reaction mixture by centrifuge and washed with ethanol two times by dispersing and centrifuging to removal of the supernatant liquid. Finally, the catalyst residue was used for the next run without drying and calcination.

The products were analyzed by a gas chromatograph (GC HP7820) with flame ionization detector (FID) using a SE-30 capillary column (made by Dalian Zhonghuida Scientific Instrument Co., Ltd, China) and H<sub>2</sub> as a carrier gas. The results were quantified as HMF conversion, product selectivity and yield in molar percentage on the basis of initial molar amount of HMF. Repeated runs showed that data variation was in the range of  $\pm 2\%$  (relative value). Overall carbon balance in the products was  $> 98.5\%$ .

## References

- S1 J. Zhou, Y. Wang, X. Guo, J. Mao and S. Zhang, *Green Chem.*, 2014, **16** (11), 4669 - 4679.
- S2 N. I. Kovtyukhova, P. J. Ollivier, B. R. Martin, T. E. Mallouk, S. A. Chizhik, E. V. Buzaneva and A. D. Gorchinskiy, *Chem. Mater.*, 1999, **11**, 771-778.

## Figures

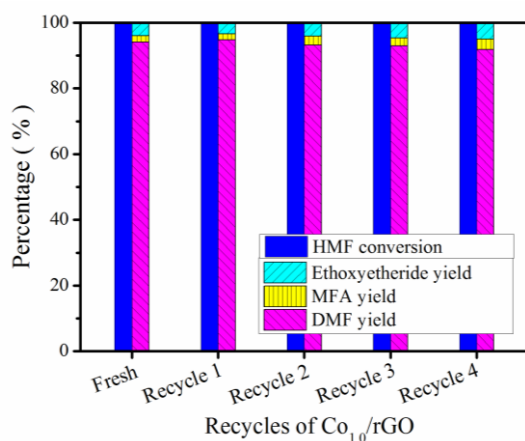

**Fig. S1.** Reuse of  $\text{Co}_{1.0}/\text{rGO}$  catalyst (reaction conditions: 500 mg of HMF in 20 mL of ethanol solvent, catalyst loading = 50 mg, 200 °C, 2MPa  $\text{H}_2$ , and 1 h).

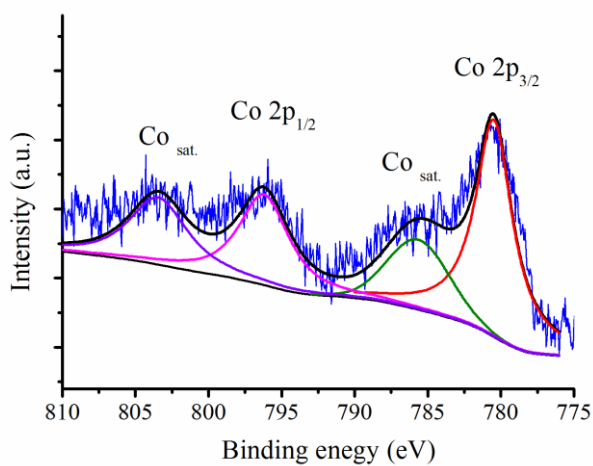

**Fig. S2.** XPS spectra in the binding energy range of  $\text{Co } 2p$  of  $\text{Co}_{1.0}/\text{rGO}$ .

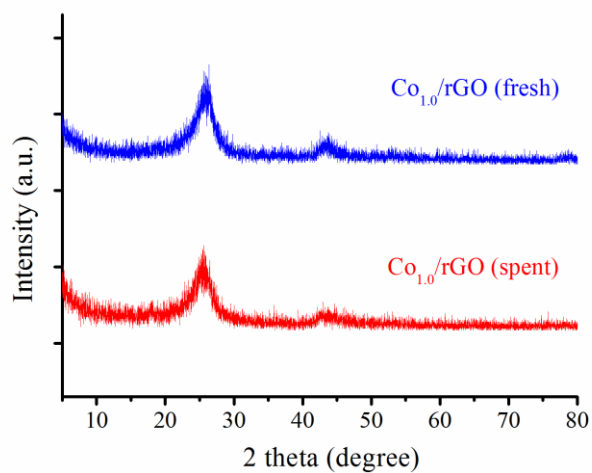

**Fig. S3.** XRD patterns of the fresh and spent  $\text{Co}_{1.0}/\text{rGO}$  catalysts.

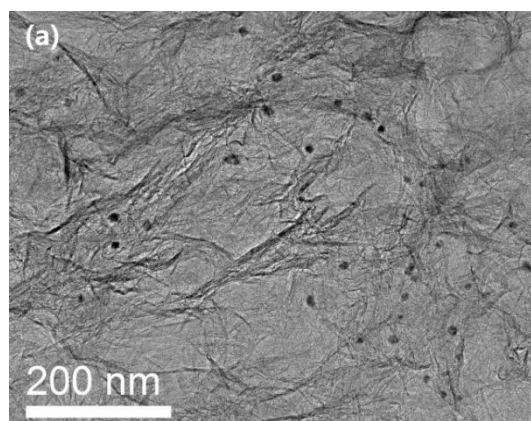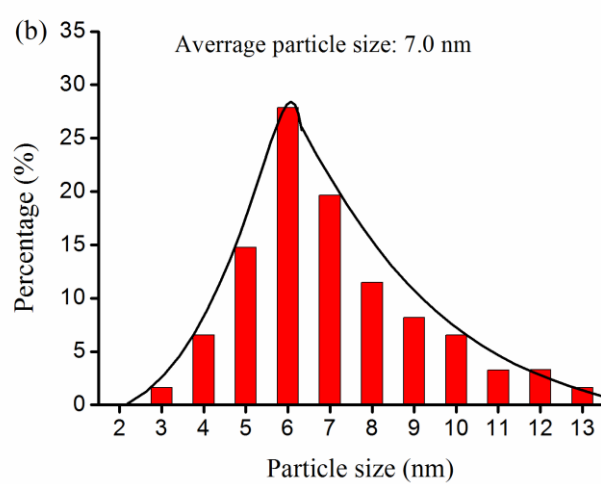

**Fig. S4.** (a) TEM image and (b) Particle size distribution of the spent  $\text{Co}_{1.0}/\text{rGO}$  catalyst.

## Tables

**Table S1.** Direct hydrogenation of HMF into DMF over transition metal catalysts.

| Entry | Catalyst                                  | Pre-reduction (°C)                                 | Solvent          | T (°C) | H <sub>2</sub> (MPa) | t (h) | Cat.(wt%) <sup>a</sup> | Con.-HMF(%) | Yield <sub>DMF</sub> (%) | Stability of the catalyst                                                                                                                               | Ref. <sup>b</sup> |
|-------|-------------------------------------------|----------------------------------------------------|------------------|--------|----------------------|-------|------------------------|-------------|--------------------------|---------------------------------------------------------------------------------------------------------------------------------------------------------|-------------------|
| 1     | Ni/Al <sub>2</sub> O <sub>3</sub>         | Reduced by H <sub>2</sub> at 500 °C                | 1,4-dioxane      | 180    | 1.2                  | 4     | 6.7                    | 100         | 91.5                     | Deactivated during recycling due to Ni oxidation and polymerization.                                                                                    | 7                 |
| 2     | Ni/C                                      | Reduced by H <sub>2</sub> at 400 °C                | THF              | 180    | 4.5                  | 17    | 5                      | 100         | 67                       | The catalyst is deactivated during recycling even if reduced each time.                                                                                 | 8                 |
| 3     | Ni/phyllsilicate                          | Reduced by H <sub>2</sub> at 500 °C                | 1,4-dioxane      | 150    | 1.5                  | 3     | 5.3                    | 100         | DMF:64.1<br>DMTHF:26.1   | Not mentioned.                                                                                                                                          | 9                 |
| 4     | Cu/ZnO                                    | Reduced by H <sub>2</sub> at 220 °C                | 1,4-dioxane      | 220    | 1.5                  | 5     | 33.3                   | 100         | 91.8                     | A sharp decrease of HMF conversion and DMF selectivity was observed due to deposition of carbonaceous species                                           | 10                |
| 5     | Fe/AC                                     | Reduced by C while pyrolyzed under Ar              | n-butanol        | 240    | 4                    | 5     | 158.6                  | 100         | 86.2                     | The catalytic activity was maintained well during five recycles.                                                                                        | 11                |
| 6     | Co-CoO <sub>x</sub>                       | Reduced by H <sub>2</sub> at 400 °C                | 1,4-dioxane      | 170    | 1                    | 12    | 20                     | 100         | 83.3                     | After the sixth run for furfural hydrogenation, the hexagonal catalyst vanished and aggregated into larger blocks.                                      | 12                |
| 7     | Ni-Co/C                                   | Reduced by H <sub>2</sub> at 400 °C                | THF              | 130    | 1.0                  | 24    | 80                     | 100         | 95.0                     | Maintain the activity after five successive runs.                                                                                                       | 13                |
| 8     | CuCo/Al <sub>2</sub> O <sub>3</sub>       | Reduced by H <sub>2</sub> at 280 °C                | THF              | 220    | 3                    | 8     | 158.6                  | 100         | 78                       | Deactivity of the catalyst due to sintering and carbon deposition                                                                                       | 14                |
| 9     | CuNi/TiO <sub>2</sub>                     | Reduced by H <sub>2</sub> at 450 °C                | 1,4-dioxane      | 200    | 2.5                  | 8     | 60                     | 99          | 84.3                     | Reactivity was gradually degraded during recycles                                                                                                       | 15                |
| 10    | Cu-Ni/γ-Al <sub>2</sub> O <sub>3</sub>    | Reduced by H <sub>2</sub> at 300 °C                | THF              | 200    | 3                    | 6     | 250                    | 99          | 56                       | NiO and CuO were appeared in the spent catalyst                                                                                                         | 16                |
| 11    | CuZn alloy                                | The drying and calcination atmosphere is not clear | CPME             | 200    | 2                    | 6     | 20                     | 100         | DMF:80.8<br>DMTHF: 16.2  | The DMF+DMTHF yield decreased to 66% after the 6th cycle, and 3% product yield was observed in the 7th cycle.                                           | 17                |
| 12    | NiZn alloy                                | Reduced by H <sub>2</sub> at 500 °C                | 1,4-dioxane      | 180    | 1.5                  | 15    | 10                     | 100         | 93.6                     | After 4 runs, HMF conversion and DMF yield exhibited a great decrease, indicating the deactivation of the catalyst.                                     | 18                |
| 13    | Ni/ N-rich carbon                         | Reduced by H <sub>2</sub> at 700 °C                | H <sub>2</sub> O | 200    | 3                    | 6     | 19.8                   | >99.9       | 98.7                     | After reaction, metallic Ni species interact with H <sub>2</sub> O to form NiO species and the catalyst need to be reduced before the repeated reaction | 19                |
| 14    | CuCo/NGr/α-Al <sub>2</sub> O <sub>3</sub> | Reduced by H <sub>2</sub> at 400 °C                | THF              | 180    | 2                    | 16    | 79.4                   | >99         | >99                      | The catalytic performance decreased after being reused five times due to the decrease of the content of pyrrolic-N in the catalyst.                     | 20                |
| 15    | C-coated CuCo nanoparticles               | Reduced by polyethylene glycol at 800 °C           | Ethanol          | 180    | 5                    | 8     | 8                      | 100         | 99.4                     | Oxidation of active metallic species due to the loss of carbon layer                                                                                    | 21                |

<sup>a</sup> Catalyst loading (wt%) is corresponding to the mass of HMF; <sup>b</sup> The reference numbers are corresponding to the numbers in the reference citations of the main text.

**Table S2.** Results of the hydrodeoxygenation of HMF over various catalysts.<sup>a</sup>

| Entry          | Catalyst                                                                | Temp.<br>(°C) | Pressu.<br>(MPa) | Time<br>(h) | Conversion (%)                                                                    |                                                                                    | Yield (%)                                                                           |                                                                                     |                     |
|----------------|-------------------------------------------------------------------------|---------------|------------------|-------------|-----------------------------------------------------------------------------------|------------------------------------------------------------------------------------|-------------------------------------------------------------------------------------|-------------------------------------------------------------------------------------|---------------------|
|                |                                                                         |               |                  |             | 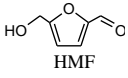 |  |  |  | Others <sup>b</sup> |
| 1              | Co <sub>1.0</sub> /rGO                                                  | 180           | 2                | 2           | 100.0                                                                             | 0.0                                                                                | 3.0                                                                                 | 94.3                                                                                | 2.7                 |
| 2              |                                                                         | 150           | 2                | 16          | 100.0                                                                             | 0.0                                                                                | 4.4                                                                                 | 90.7                                                                                | 4.9                 |
| 3 <sup>c</sup> |                                                                         | 140           | 2                | 20          | 100.0                                                                             | 0.0                                                                                | 0.0                                                                                 | 94.7                                                                                | 5.3                 |
| 4              |                                                                         | 200           | 3                | 15          | 100.0                                                                             | 0.0                                                                                | 0.0                                                                                 | 97.6                                                                                | 2.4                 |
| 5              |                                                                         | 220           | 4                | 1           | 100.0                                                                             | 0.0                                                                                | 0.0                                                                                 | >99.0                                                                               | <1.0                |
| 6              | Co <sub>1.0</sub> /HrGO<br>+Co <sub>3</sub> O <sub>4</sub> <sup>d</sup> | 200           | 2                | 1           | 100.0                                                                             | 0.0                                                                                | 0.0                                                                                 | 97.1                                                                                | 2.9                 |
| 7              | Fe <sub>1.0</sub> /rGO                                                  | 200           | 2                | 1           | 24.2                                                                              | 24.2                                                                               | -                                                                                   | -                                                                                   | -                   |
| 8              | Ni <sub>1.0</sub> /rGO                                                  | 200           | 2                | 1           | 58.4                                                                              | 43.8                                                                               | 6.2                                                                                 | 3.6                                                                                 | 4.6                 |

<sup>a</sup> Reaction conditions: 500 mg of HMF in 20 mL of ethanol, catalyst loading = 50 mg (10 wt.% with respect to HMF); <sup>b</sup> Ethoxyetherides from etherification of ethanol with HMF and its derivatives; <sup>c</sup> Catalyst loading = 100 mg (20 wt.% with respect to HMF); <sup>d</sup> Catalyst loading = 50 mg of Co<sub>1.0</sub>/HrGO + 50mg of Co<sub>3</sub>O<sub>4</sub>.
